# Supplementary material for: Ferromagnetic intermolecular exchange interaction in ethynyl-verdazyl radical crystals
Source: Royal Society of Chemistry journal article supplement (doi:10.1039/c4ce01437e), 2014-01-01
Supplement: c4ce01437e1.pdf [file c4ce01437e1.pdf]

# Ferromagnetic intermolecular exchange interaction in ethynyl-verdazyl radical crystals

Areej Merhi,<sup>a</sup> Thierry Roisnel,<sup>a</sup> Stéphane Rigaut,<sup>a</sup> Cyrille Train<sup>b</sup> and Lucie Norel<sup>a\*</sup>

(a) UMR 6226 CNRS - Université de Rennes 1, Institut des Sciences Chimiques de Rennes, Campus de Beaulieu, F-35042 Rennes Cedex. Fax: +33 2 23 23 69 39; E-mail: [lucie.norel@univ-rennes1.fr](mailto:lucie.norel@univ-rennes1.fr)

(b) LNCMI, UPR 3228, CNRS-UJF-UPS-INSA and UJF, 38042 Grenoble, France

## Supporting Information

### Table of Contents

**Figure S1** : UV-vis absorption spectrum for **2** in dichloromethane.

**Figure S2** : Powder X-ray diffraction patterns of radical **2**

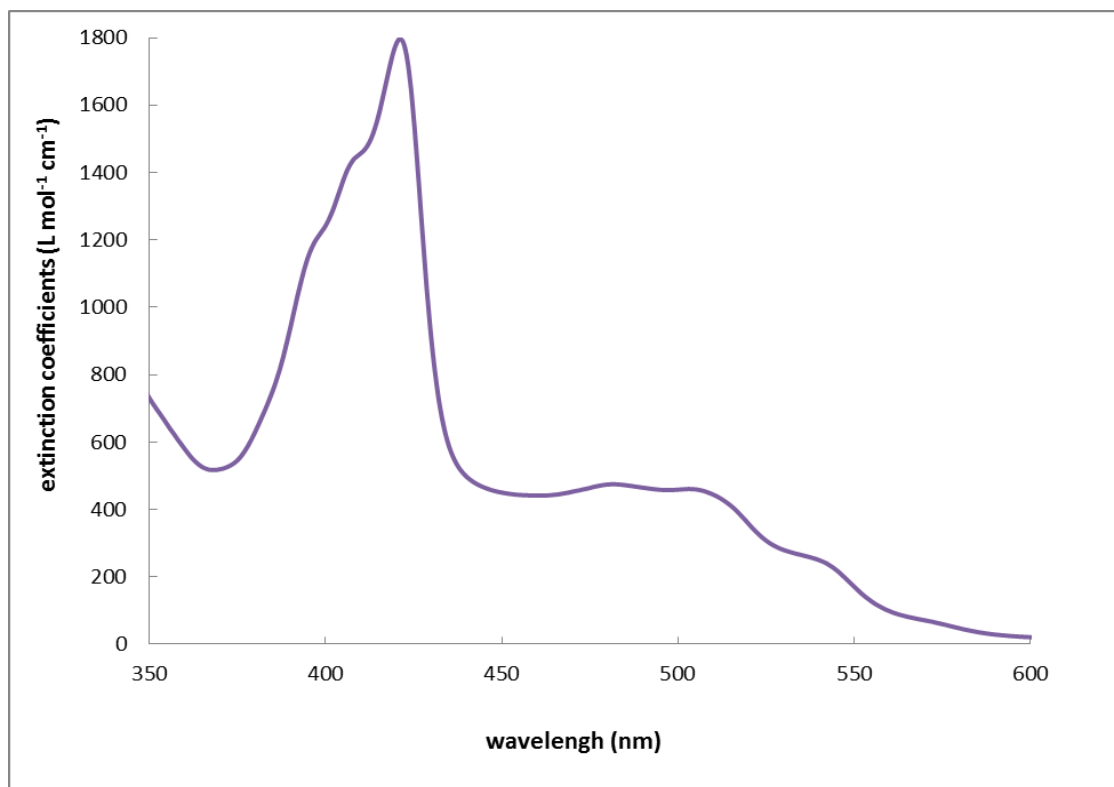

**Figure S1** : UV-vis absorption spectrum for **2** in dichloromethane.

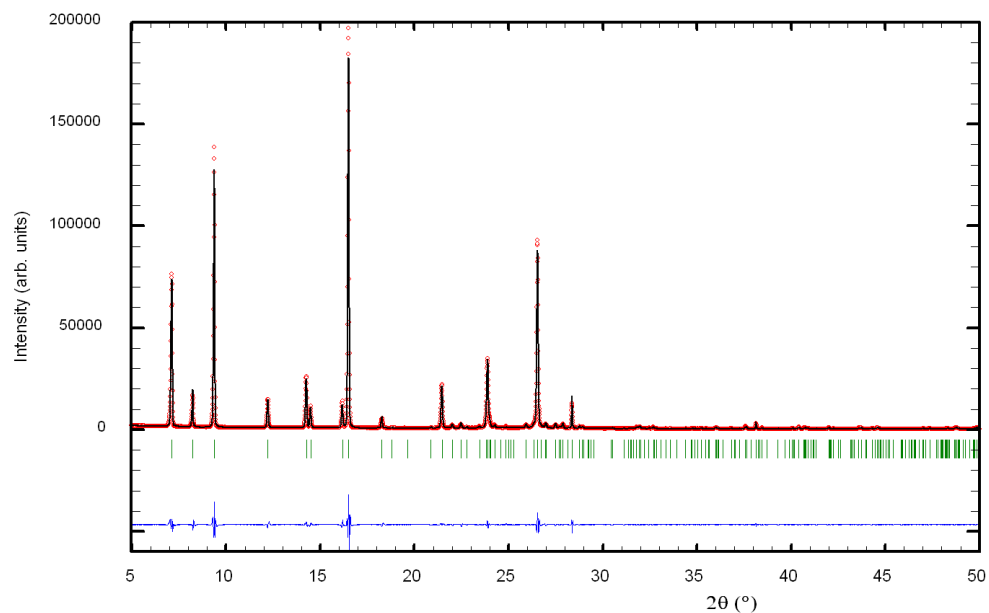

**Figure S2** : Powder X-ray diffraction patterns of radical **2** at room temperature : red points are observed pattern and black line is refined profile with FullProf program in profile matching mode. Vertical ticks are refined Bragg peak positions in P-1 triclinic space group with  $a = 4.0642(1)$ ,  $b = 11.1503(3)$ ,  $c = 12.8947(3)$  Å,  $\alpha = 104.742(1)$ ,  $\beta = 94.342(32)$ ,  $\gamma = 94.131(2)^\circ$ .
